# The gut microbiome is a significant risk factor for future chronic lung disease

Yang Liu<sup>1,2</sup>, Shu Mei Teo<sup>2,3</sup>, Guillaume Meric<sup>2</sup>, Howard H.F. Tang<sup>2,3</sup>, Qiyun Zhu<sup>4,5</sup>, Jon G Sanders<sup>6</sup>, Yoshiki Vazquez-Baeza<sup>6</sup>, Karin Verspoor<sup>7,8</sup>, Ville A Vartiainen<sup>9,10,11</sup>, Pekka Jousilahti<sup>9</sup>, Leo Lahti<sup>12</sup>, Teemu Niiranen<sup>9,13</sup>, Aki S. Havulinna<sup>9,14</sup>, Rob Knight<sup>6,15,16</sup>, Veikko Salomaa<sup>9</sup>, Michael Inouye<sup>1-3,17-20\*</sup>

<sup>1</sup>Department of Clinical Pathology, Melbourne Medical School, The University of Melbourne, Melbourne, Victoria, Australia

<sup>2</sup>Cambridge Baker Systems Genomics Initiative, Baker Heart and Diabetes Institute, Melbourne, Victoria, Australia

<sup>3</sup>Cambridge Baker Systems Genomics Initiative, Department of Public Health and Primary Care, University of Cambridge, Cambridge, United Kingdom

<sup>4</sup>School of Life Sciences, Arizona State University, Tempe, AZ, USA

<sup>5</sup>Biodesign Center for Fundamental and Applied Microbiomics, Arizona State University, Tempe, AZ, USA

<sup>6</sup>Department of Pediatrics, School of Medicine, University of California San Diego, La Jolla, CA, USA

<sup>7</sup>School of Computing Technologies, RMIT University, Melbourne, Victoria, Australia

<sup>8</sup>School of Computing and Information Systems, The University of Melbourne, Melbourne, Victoria, Australia

<sup>9</sup>Department of Public Health and Welfare, Finnish Institute for Health and Welfare, Helsinki, Finland

<sup>10</sup>Individualized Drug Therapy Research Program, Faculty of Medicine, University of Helsinki, Finland

<sup>11</sup>Department of Pulmonary Medicine, Heart and Lung Center, Helsinki University Hospital, Finland

<sup>12</sup>Department of Computing, University of Turku, Turku, Finland

<sup>13</sup>Division of Medicine, Turku University Hospital and University of Turku, Turku, Finland

<sup>14</sup>Institute for Molecular Medicine Finland, FIMM-HiLIFE, University of Helsinki, Helsinki, Finland

<sup>15</sup>Department of Computer Science and Engineering, University of California San Diego, La Jolla, CA, USA

<sup>16</sup>Center for Microbiome Innovation, Jacobs School of Engineering, University of California San Diego, La Jolla, CA, USA

<sup>17</sup>British Heart Foundation Cardiovascular Epidemiology Unit, Department of Public Health and Primary Care, University of Cambridge, Cambridge, UK

<sup>18</sup>British Heart Foundation Cambridge Centre of Research Excellence, School of Clinical Medicine, University of Cambridge, Cambridge, UK

<sup>19</sup>Health Data Research UK Cambridge, Wellcome Genome Campus and University of Cambridge, Cambridge, UK

<sup>20</sup>The Alan Turing Institute, London, UK

\*Correspondence:

MI ([minouye@baker.edu.au](mailto:minouye@baker.edu.au) or [mi336@medschl.cam.ac.uk](mailto:mi336@medschl.cam.ac.uk)); YL ([yang.liu2@baker.edu.au](mailto:yang.liu2@baker.edu.au) or [yangl25@student.unimelb.edu.au](mailto:yangl25@student.unimelb.edu.au))

NOTE: This preprint reports new research that has not been certified by peer review and should not be used to guide clinical practice.

## 50 **Abstract**

51 **Background:** The gut-lung axis is generally recognized, but there are few large studies of the  
52 gut microbiome and incident respiratory disease in adults.

53 **Objectives:** To investigate the associations between gut microbiome and respiratory disease  
54 and to construct predictive models from baseline gut microbiome profiles for incident asthma  
55 or chronic obstructive pulmonary disease (COPD).

56 **Methods:** Shallow metagenomic sequencing was performed for stool samples from a  
57 prospective, population-based cohort (FINRISK02; N=7,115 adults) with linked national  
58 administrative health register derived classifications for incident asthma and COPD up to 15  
59 years after baseline. Generalised linear models and Cox regressions were utilised to assess  
60 associations of microbial taxa and diversity with disease occurrence. Predictive models were  
61 constructed using machine learning with extreme gradient boosting. Models considered taxa  
62 abundances individually and in combination with other risk factors, including sex, age, body  
63 mass index and smoking status.

64 **Results:** A total of 695 and 392 significant microbial associations at different taxonomic levels  
65 were found with incident asthma and COPD, respectively. Gradient boosting decision trees of  
66 baseline gut microbiome predicted incident asthma and COPD with mean area under the  
67 curves of 0.608 and 0.780, respectively. For both incident asthma and COPD, the baseline  
68 gut microbiome had C-indices of 0.623 for asthma and 0.817 for COPD, which were more  
69 predictive than other conventional risk factors. The integration of gut microbiome and  
70 conventional risk factors further improved prediction capacities. Subgroup analyses indicated  
71 gut microbiome was significantly associated with incident COPD in both current smokers and  
72 non-smokers, as well as in individuals who reported never smoking.

73 **Conclusions:** The gut microbiome is a significant risk factor for incident asthma and incident  
74 COPD and is largely independent of conventional risk factors.

75

## 76 Introduction

77 Asthma and chronic obstructive pulmonary disease (COPD) represent the vast majority of  
78 chronic respiratory diseases worldwide, causing a considerable burden on health and  
79 economy[1, 2]. Both asthma and COPD are recognized as heterogeneous diseases with  
80 diverse phenotypes and various underlying mechanisms[3-6]. Currently, spirometry-confirmed  
81 airflow limitation is the most common reference standard for establishing diagnoses of asthma  
82 and COPD, yet a negative spirometry test result does not rule out the disease[7, 8]. Other  
83 criteria that complement evaluation include self-reported symptoms, medical history, physical  
84 examination and other diagnoses such as infection, interstitial lung disease, and others[7, 9].  
85 Despite rapidly changing assessments and treatments, both asthma and COPD remain largely  
86 underdiagnosed and thus undertreated, leading to lesser quality of life and poorer disease  
87 outcomes[3, 9].

88 With recent advances in high-throughput sequencing, improved characterisation of the human  
89 respiratory and gastrointestinal microbiome has been followed by growing recognition of the  
90 link between human microbiota and chronic respiratory disease[10, 11]. The gut microbiome  
91 is by far the largest and most studied microbial community in the human body[11, 12].  
92 Although the lung microbiome has become well characterized only recently, the link between  
93 the lung microbiome and respiratory diseases has been generally acknowledged[10, 13-15].  
94 “Dysbiotic” changes in both airway and gut microbiome have been linked to respiratory  
95 diseases; however, the precise mechanism or causal pathway is, as yet, not well  
96 understood[16-19]. Emerging evidence suggests cross-talk between gut microbiome and the  
97 lungs, via changes to immune responses as well as an interaction of microbiota between the  
98 sites, in a hypothesised “gut-lung axis”[11, 20].

99 Existing studies on the association between gut microbiota and asthma have focused mainly  
100 on disease development during childhood[21-23] which is driven by evidence of the influence  
101 of early-life microbial exposures on immune function[24, 25]. Previous cross-sectional studies  
102 have reported compositional and functional differences of the gut microbiome between adult  
103 asthma patients and healthy controls [26-29]. However, little is known about whether and to  
104 what extent the gut microbiome affects prospective risk of developing incident asthma in  
105 adults. For COPD, there have been far fewer studies on the link between the gut microbiome  
106 and disease. Recently, the first analysis of gut microbiome in COPD by Bowerman et al.  
107 reported that the faecal microbiome and metabolome significantly differentiate COPD patients  
108 and healthy controls[30], which suggests a possible avenue for further investigation using  
109 prospective population-scale datasets. Finally, it is only in recent years that methodological  
110 and technological advances have opened up the possibility of using large-scale microbial data  
111 to predict human respiratory disease[22, 31], but the feasibility of such measures has yet to  
112 be evaluated for COPD.

113 Here we report association analysis and predictive modelling of the gut microbiome and  
114 incident asthma and COPD using stool samples from >7,000 participants of a prospective  
115 population-based cohort (FINRISK 2002) with electronic health records (EHRs) over ~15  
116 years of follow-up[32]. Specifically, we (1) describe the gut microbial composition from shallow  
117 shotgun metagenomic sequencing and assess the associations with incident asthma and  
118 COPD, (2) employ machine learning approaches to quantify the predictive capacities of the  
119 gut microbiome at baseline for incident respiratory disease, and (3) construct integrated

120 models of the gut microbiome and conventional risk factors and evaluated their predictive  
121 performance.

## 122 Results

123 A total of 7,115 FINRISK02 participants with baseline gut microbiome profiles and EHR  
124 linkage were available for the present study. A summary description of the cohort is given in  
125 the **Methods** and baseline characteristics are reported in **Table 1**. After quality control and  
126 exclusion criteria were applied, 435 and 145 incident cases of asthma and COPD,  
127 respectively, occurred during a median follow-up of 14.8 years after gut microbiome sampling  
128 at baseline. Notably, more males than females developed COPD, and incident COPD cases  
129 displayed older baseline age than non-cases ( $P<0.001$ ). The age of onset of incident COPD  
130 was significantly older compared to incident asthma ( $P<0.001$ ). A higher body mass index  
131 (BMI) was observed in asthma cases vs non-cases ( $P=0.002$ ), while there was no significant  
132 difference in BMI between COPD cases and non-cases. For both COPD and asthma, a higher  
133 proportion of current smokers during the survey year were observed in disease cases than  
134 non-cases.

### 135 Gut microbiome composition and taxon-level abundances

136 Individual gut microbiome compositions were characterized by shallow shotgun metagenomic  
137 sequencing of stool samples (**Methods**). The present study focused on microbial taxa whose  
138 relative abundance exceeded 0.01% in at least 1% of samples; this yielded 46 phyla, 71  
139 classes, 124 orders, 232 families, 617 genera and 1,224 species, as classified according to  
140 the Genome Taxonomy Database (GTDB) release 89[33]. The majority of the gut microbiota  
141 were dominated by the Firmicutes\_A and Bacteroidota phyla (**Fig 1A**), which mostly  
142 comprised members of classes Clostridia and Bacteroidia, respectively. At the genus level,  
143 *Faecalibacterium* and *Agathobacter* in phylum Firmicutes\_A, as well as *Bacteroides*,  
144 *Bacteroides\_B* and *Prevotella* in phylum Bacteroidota were most abundant in a majority of  
145 samples (**Fig 1B**).

146 Baseline alpha-diversity measures significantly differed between incident asthma cases and  
147 non-cases ( $P<0.01$ ), with lower values of Shannon's, Chao1, and Pielou's indices in  
148 individuals who went on to develop asthma (**Fig 1C**). Alpha-diversity indices were not  
149 significantly different between COPD cases and non-cases. Principal component analysis of  
150 the centered log-ratio (CLR) transformed abundances showed no clear separation between  
151 incident cases and non-cases (**Fig 1D**), suggesting that the association of incident asthma  
152 and COPD with the gut microbiome was unlikely related to the whole microbial community  
153 and may be attributable to specific microbial taxa.

154 We assessed the association between baseline taxon-level microbial abundances and  
155 incident respiratory diseases using Cox regression, based on centered log-ratios (**Methods**).  
156 At 5% false discovery rate, significant associations of incident asthma were found in 5 phyla,  
157 5 classes, 18 orders, 111 families, 257 genera and 299 species (**Table S1**); for incident COPD,  
158 we found significant associations with 5 phyla, 7 classes, 32 orders, 57 families, 133 genera  
159 and 158 species (**Table S2**). Of the asthma- and COPD-associated taxa, 76% and 68.6%  
160 showed positive associations with disease incidence, respectively. A number of highly  
161 abundant genera were associated with incident asthma, such as *Bacteroides*,  
162 *Faecalibacterium*, *Agathobacter*, *Blautia\_A* and *Roseburia* (**Fig 1E**). Among the most

163 abundant COPD-associated genera, increased abundance of *Faecalicatena*, *Oscillibacter*,  
164 *Lawsonibacter*, *Flavonifractor* and *Streptomyces*, and reduced abundances of *Lachnospira*,  
165 *ER4*, *KLE1615*, *Eubacterium\_F* and *Coproccoccus* were associated with incident COPD.

## 166 **Gut microbiome and gradient boosting decision trees to predict incident asthma and** 167 **COPD**

168 To investigate whether the baseline gut microbiome was predictive of incident asthma and  
169 COPD, we train and validate prediction models via the machine learning algorithm of gradient  
170 boosting decision trees. These models were trained with 5-fold cross-validation in 70% of the  
171 individuals and then the performances were validated in the remaining 30% (**Methods**); all  
172 performance metrics given are based on the 30% validation set unless otherwise specified.  
173 Models were developed at different taxonomic levels separately and for a combination of all  
174 taxonomic levels (**Fig S1**). To assess sampling variation, we resampled training and testing  
175 partitions at different taxonomic levels 10 times and report mean values of prediction  
176 performance.

177 The best performance was obtained at individual taxonomic levels, rather than their  
178 combination, for both asthma and COPD prediction. Generally better prediction performance  
179 was attained at lower taxonomic levels, particularly for COPD where the highest average area  
180 under the operating characteristic curve (AUC) was at species level (mean AUC = 0.780),  
181 followed by genus (mean AUC = 0.734) and family (mean AUC = 0.688) levels. For prediction  
182 of incident asthma, the best performance was obtained at family level (mean AUC = 0.608),  
183 with slight attenuation of AUC scores obtained at genus (mean AUC = 0.592) and species  
184 (mean AUC = 0.593) levels.

## 185 **The gut microbiome had greater predictive value than individual conventional risk** 186 **factors**

187 To compare the predictive value of conventional risk factors and the gut microbiome for  
188 incident asthma and COPD, we first conducted univariate analysis using Cox models. We  
189 utilised the optimal cross-validated gradient boosting model at family and species level for  
190 asthma and COPD, respectively, and refer to the resultant score as a “gut microbiome score”  
191 for each condition. We found that the gut microbiome score had a relatively high predictive  
192 capacity with C-indices of 0.623 for asthma and 0.817 for COPD, which were each greater  
193 than those of other risk factors (**Fig 2**). Smoking status at baseline was significantly associated  
194 with increased risk of both asthma (HR=2.21, 95% CI [1.53-3.20], P <0.001) and COPD  
195 (HR=8.16 [4.55-14.64], P<0.001) compared with non-smoking (**Table 2**). Increased incidence  
196 of COPD was also significantly associated with male sex (HR=2.19 [1.25-3.82], P=0.01) and  
197 older baseline age (HR=1.07 per year, [1.04-1.10], P<0.001). The gut microbiome score was  
198 associated with increased incidence of both asthma (HR=1.44 per s.d., [1.23-1.67], P<0.001)  
199 and COPD (HR=1.39 per s.d., [1.30-1.49], P<0.001).

## 200 **Integrated prediction models of the gut microbiome and conventional risk factors**

201 When integrating risk factors and gut microbiome score, the Cox model for asthma showed  
202 that current smoking status and gut microbiome were significantly associated with higher risk  
203 (HR=2.06 [1.40-3.03], P<0.001, and HR=1.34 per SD [1.15-1.57], P<0.001, respectively), and  
204 male sex was significantly associated with lower risk (HR=0.67 [0.46-0.97], P=0.03), whereas  
205 there were no significant associations for baseline age and BMI (**Table 2**). For COPD, baseline  
206 age, current smoking status and gut microbiome score were significant predictors (HR= 1.1



207 per year [1.07-1.13]  $P < 0.001$ ; HR=11.07 [5.81-21.09],  $P < 0.001$ ; and HR=1.18 per SD [1.08-  
208 1.29],  $P < 0.001$  respectively). While consistent with the individual predictive power of the gut  
209 microbiome score (**Fig 2**), the multivariable Cox model showed the risk associated with current  
210 smokers at baseline was significantly greater than other risk factors for COPD.

211 In subgroup analyses, the gut microbiome score association patterns were generally  
212 consistent with those above (**Fig 3**). For COPD, where current smoking status had a relatively  
213 large hazard ratio, the gut microbiome score was independently associated with incident  
214 COPD in both current smokers and non-smokers. In individuals who indicated past smoking  
215 but who were not current smokers at survey ( $n=414$ ), we found that the gut microbiome score  
216 was not significantly associated with incident COPD (HR=1.22 [0.89-1.68],  $P=0.22$ ) but that,  
217 in individuals who reported never smoking ( $n=970$ ), there was a significant association with  
218 incident COPD (HR=1.40 [1.02-1.91],  $P=0.04$ ). Finally, in COPD, we observed evidence for  
219 statistical interactions of the gut microbiome score with age and sex (**Fig 3**).

220 The integrated models showed significantly improved predictive capacity for both incident  
221 asthma and COPD (**Fig 4**). For asthma, a reference model of age, sex and BMI yielded C-  
222 index of 0.567; addition of smoking status then gut microbiome score increased the C-index  
223 further to 0.626 and 0.656, respectively. For COPD, the reference model of age, sex and BMI  
224 yielded C-index of 0.735; addition of smoking status then gut microbiome score increased the  
225 C-index further to 0.855 and 0.862, respectively.

## 226 Discussion

227 In this prospective study, we investigated the association and predictive capacity of the gut  
228 microbiome for future chronic respiratory diseases, asthma and COPD, in adults using  
229 shotgun metagenomics. We demonstrated that the gut microbiome is significantly associated  
230 with incident asthma and COPD and evaluated the relative contributions of traditional risk  
231 factors and a gut microbiome score. We then constructed integrated risk models which  
232 maximised predictive performance. Taken together, our findings indicate that the gut  
233 microbiome is a valid and potentially substantive biomarker for both asthma and COPD.

234 The gut and lung microbial communities, although residing in distal sites, are dominated by  
235 broadly similar bacterial phyla, including Firmicutes and Bacteroidetes, but differ in local  
236 compositions and total microbial biomass[11]. Some of our findings are relevant to previous  
237 microbial studies of the respiratory tract. For example, *Haemophilus* and *Streptococcus* have  
238 been previously found to be positively associated with respiratory illnesses in the airways [18,  
239 34, 35]. In our gut microbiome samples, we also found positive associations between  
240 *Streptococcus* and incident asthma; however, we found that multiple *Haemophilus spp.* were  
241 significantly negatively associated with incident COPD. An increased abundance of  
242 *Pseudomonas spp.* from the airway microbiome was previously reported in COPD  
243 exacerbations[36, 37] and impaired pulmonary function[38, 39]. Consistent with this, we found  
244 positive associations of the *Pseudomonas*, *Pseudomonas\_A* and *Pseudomonas\_E* genera  
245 (all part of *Pseudomonas* according to the NCBI taxonomy) with incident asthma and COPD.  
246 These findings support the emerging evidence of possible functional links between the  
247 respiratory tract and gastrointestinal tract, however the underlying mechanisms by which  
248 microorganisms between the sites may interact remain unclear[40, 41].

249 Despite increasing recognition of the existence of gut-lung crosstalk, the role of the gut  
250 microbiota in respiratory disease has been primarily studied in children. Its relevance in adults  
251 has been unclear. Previous studies have demonstrated that the early-life gut microbial  
252 alteration and maturation patterns influence the risk of asthma development in childhood[22,  
253 23, 42]. In our data, we found that higher abundances of *Escherichia*[31], *Enterococcus*,  
254 *Clostridium*, *Veillonella*, and *B. fragilis* were associated with increased incidence of asthma in  
255 adulthood, consistent with that observed for childhood asthma[22, 43, 44] . In contrast to  
256 previous findings showing that the relative abundances of *Faecalibacterium*, *Roseburia* and  
257 *Flavonifractor* were decreased in childhood asthma[22, 43], we found positive associations  
258 with adult-onset asthma. We confirmed previous findings that increased abundances of  
259 *Clostridium* and *Eggerthella lenta* in the adult gut microbiome were associated with  
260 asthma[27]. The relationship between the gut microbiome and COPD is even less understood.  
261 A recent study reported that *Streptococcus sp000187445* was enriched in COPD patients and  
262 was correlated with reduced lung function[30], which was also confirmed by a positive  
263 association with incident COPD in our study.

264 Regarding consideration of causality in observational studies, it is challenging to determine  
265 whether the composition of the gut microbiome is a cause or consequence of respiratory  
266 disease. In this respect, one strength of our study was the use of baseline gut microbiome and  
267 incident disease systematically identified through EHRs. The follow-up using EHRs was nearly  
268 complete in all samples (except for the small number of participants who moved abroad  
269 permanently). Using machine learning models, we found that the baseline gut microbiome had  
270 moderate predictive capacities in distinguishing incident cases from non-cases for asthma and  
271 COPD, suggesting that there are detectable changes in the gut microbiome antecedent to the  
272 onset of symptomatic disease. This does not confirm causality or eliminate other possibilities.  
273 For example, disease-associated host changes and gut microbial alteration may influence  
274 each other and operate simultaneously[40]. We also showed that the association between gut  
275 microbiome-based predictions and incident asthma or COPD was largely independent of age,  
276 sex, BMI and smoking, all of which can influence susceptibility to respiratory diseases[45-48].  
277 Moreover, significant interactions of gut microbiome by sex and age were found, suggesting  
278 different impact of gut microbiome on age and sex groups, consistent with findings in other  
279 settings[49-51].

280 Importantly, our study affirms the large body of evidence that smoking is associated with  
281 respiratory illness, especially COPD. Despite many ways to characterise the smoking  
282 phenotype, we found that individuals who reported being current smokers were at high risk of  
283 future asthma and COPD. The association between smoking and gut microbiota is well  
284 established and smoking cessation has been shown to have profound, putatively causal  
285 effects on the gut microbiome[52]. Our results show that, particularly for COPD, the gut  
286 microbiome is both a substantial independent predictor of future disease and that its predictive  
287 power is partially explained by smoking behaviour. As such, our findings are both consistent  
288 with previous studies and take us a step closer to delineating which and to what extent  
289 particular gut microbial taxa sit along the causal path from smoking behaviour to future asthma  
290 and COPD. For the latter, larger prospective studies will be necessary but population-scale  
291 gut microbiome and e-health studies are under way.

292 There are limitations of the present study. Firstly, despite a relatively large sample size, our  
293 study was enrolled from a single European country (Finland), and the generalizability of the  
294 findings to other geographically- and culturally-distinct settings will require further

295 investigation. Furthermore, only one time point of the gut microbiome was sampled per  
296 individual, which did not allow for dynamic or temporal assessment of gut microbiome  
297 alterations along with incident disease onset. Changes in diet and environmental exposures  
298 (apart from smoking) can induce changes in gut microbiota and should be considered in future  
299 studies. While the asthma and COPD phenotypes can be difficult to diagnosis or indeed  
300 overlap in some individuals, our study takes a pragmatic approach and future clinical cohorts  
301 may be necessary to precisely quantify disease specific effects. Finally, although formal lung  
302 function test results (FEV1, FVC) may further improve prediction, it was not feasible to perform  
303 wholesale clinical examination of airflow obstruction at the population level. Regardless, our  
304 study demonstrates that future exploration of the influence of the gut microbiome in severity  
305 and progression of asthma and COPD is warranted, and may lead to further clinically-  
306 significant findings.

307 Our study supports the role of gut microbiome in adult respiratory disease and as potential  
308 biomarkers that might aid in risk profiling of asthma and COPD. The underlying mechanisms  
309 and causal links by which gut microbiota influence the lung, and vice versa, remain to be  
310 established.

311



## 312 **Methods**

### 313 **Study design and participants**

314 The FINRISK 2002 study is a population-based nationwide survey carried out in Finland in  
315 2002, consisting of random samples of the population aged 25 to 74 years drawn from the  
316 National Population Information System[32]. The survey included self-administered  
317 questionnaires, health examinations conducted at the study sites by trained personnel, and  
318 collection of biological samples. The overall participation rate was 65.5% (n = 8798). The  
319 participants were followed up through linkage to national administrative electronic registers  
320 that proved highly reliable[53-55]. Inclusion criteria have been described elsewhere[32].  
321 Exclusion criteria for the present study are missing follow-ups, prior diagnosis of the disease  
322 for prediction, baseline pregnancy, systemic use of antibiotics at baseline and unmet  
323 sequencing depth. The incident cases of asthma and COPD were identified according to ICD-  
324 10 diagnosis codes (Finnish modification) from linked EHRs which were last followed up by  
325 Dec 31<sup>st</sup>, 2016. COPD cases were defined using ICD codes J43|J44; asthma cases were  
326 defined using ICD codes J45|J46, or the Social Insurance Institution of Finland (Kela)  
327 reimbursement code 203 for asthma medication, or medicine purchases with ATC codes  
328 R03BA|R03BC|R03DC|R03AK. Covariates included baseline age, sex, body mass index  
329 (BMI), and smoking. Written informed consent was obtained from all participants. The  
330 Coordinating Ethics Committee of the Helsinki and Uusimaa Hospital District approved the  
331 FINRISK 2002 study protocols (Ref. 558/E3/2001). The study was conducted according to the  
332 World Medical Association's Declaration of Helsinki on ethical principles.

### 333 **Sample collection**

334 During the baseline survey, stool samples were collected by participants at home using a  
335 collection kit with instructions, and mailed overnight under winter conditions to the Finnish  
336 Institute for Health and Welfare for storing at -20°C. The frozen stool samples were transferred  
337 to University of California San Diego for sequencing in 2017.

### 338 **DNA extraction, sequence processing and taxonomic profiling**

339 The gut microbiome was characterized by shallow shotgun metagenomics sequencing[56]  
340 with an Illumina HiSeq 4000 platform to a mean depth of  $\sim 10^6$  reads/sample. The stool shotgun  
341 sequencing was successfully performed in 7,231 individuals. Libraries were prepared using  
342 KAPA HyperPlus Kit according to manufacturer's protocol. Sequencing reads were processed  
343 using the Snakemake pipeline[57]. Removal of low quality, adapter and host reads was  
344 performed. The details of DNA extraction and library preparation for stool samples have been  
345 described elsewhere[31]. Samples were filtered by sequencing depth of 400,000  
346 reads/sample to preserve data quality and the majority of disease cases which resulted in  
347 7163 samples remaining. The metagenomes were classified using default parameters in  
348 Centrifuge 1.0.4[58], and using an index database based on taxonomic definitions from the  
349 Genome Taxonomy Database (GTDB) release 89[33]. In total, 151 phyla, 338 classes, 925  
350 orders, 2,254 families, 7,906 genera and 24,705 species were uniquely identified based on  
351 GTDB taxonomy. The relative abundances of bacterial taxa at phylum, class, order, family,  
352 genus and species levels were computed. The present analyses focused on common taxa  
353 with relative abundances greater than 0.01% in more than 1% of samples. Three measures  
354 of microbial diversity were calculated: Shannon's alpha diversity, Chao1 richness and Pielou's  
355 evenness (R packages vegan and otuSummary). The centered log-ratio (CLR) transformation

356 was performed on abundance data, of which the zeros were substituted with 1/10 of non-zero  
357 minimum abundance. Further analyses were based on CLR transformed abundances.

### 358 **Machine learning and statistical analysis**

359 A machine learning framework was employed to develop prediction models at different  
360 taxonomic levels separately. The samples were randomly partitioned into two subsets: (1) a  
361 training dataset (70% of samples) for developing models, and (2) a validation dataset (30% of  
362 samples) for evaluating prediction performance. We resampled the data 10 times and  
363 performed the same training and validation procedure for each sampling partition. In each  
364 training dataset, we first selected microbial indicators for predicting incident asthma and  
365 COPD; we analyzed the relationships between taxon-level abundance and incident disease  
366 using logistic regression adjusted for age and sex, Cox regression for time to disease onset  
367 adjusted for age and sex and Spearman correlation. The taxa that were associated with  
368 incident diseases at a significance threshold of  $P < 0.05$  by any of the above approaches were  
369 selected for further analyses. The selected taxa together with diversity measurements were  
370 considered as microbial predictors for developing prediction models. Next, gradient boosting  
371 decision tree (implemented by Xgboost) models were developed with Bayesian optimization  
372 through 5-fold cross-validation to determine optimal hyperparameters. The optimal setting was  
373 then trained on the whole training data to build the final model used in validation. We  
374 additionally performed ridge logistic regression to compare the prediction performance using  
375 the same samples for training and testing. The gradient boosted trees-based models  
376 outperformed those based on ridge logistic regression. A similar trend of prediction  
377 performance across taxonomic levels was observed with both methods. The final performance  
378 across various models and partitions was assessed in the validation datasets.

379 Wilcoxon rank-sum test was performed to compare differences in patient characteristics, gut  
380 microbial relative abundances and diversity metrics between incident cases and non-cases.  
381 Cox regression with adjustment of age and sex was utilized to assess the association between  
382 taxon-level CLR abundance and incident disease using all samples (FDR < 0.05 was  
383 considered as statistical significance). The gut microbiome-based predictions from the optimal  
384 gradient boosting model were used as the gut microbiome scores for further analyses in its  
385 respective validation dataset for each disease condition. Cox models of conventional risk  
386 factors and in combination with the gut microbiome score were built using the time from  
387 baseline to the occurrence of the disease or end of follow-up. Machine learning and statistical  
388 analysis of data were carried out in R (version 3.6.1).

### 389 **Data and code availability**

390 The FINRISK data for this study are available with a written application to the THL Biobank as  
391 instructed on the website: <https://thl.fi/en/web/thl-biobank/for-researchers>. A separate  
392 permission is needed from FINDATA (<https://www.findata.fi/en/>) for use of the EHR data.  
393 Custom code for analysis in this study is available at  
394 [https://github.com/yangl700/microb\\_pred](https://github.com/yangl700/microb_pred).

395

## 396 **Acknowledgements**

397 VS was supported by the Finnish Foundation for Cardiovascular Research and by Juho Vainio  
398 Foundation. MI was supported by the Munz Chair of Cardiovascular Prediction and  
399 Prevention. ASH was supported by the Academy of Finland, grant no. 321356. LL was  
400 supported by Academy of Finland (295741, 328791). TN was supported by the Emil Aaltonen  
401 Foundation, the Finnish Foundation for Cardiovascular Research and the Academy of Finland  
402 (grant no. 321351). This study was supported by the Victorian Government's Operational  
403 Infrastructure Support (OIS) program and by core funding from the British Heart Foundation  
404 (RG/13/13/30194; RG/18/13/33946) and the NIHR Cambridge Biomedical Research Centre  
405 (BRC-1215-20014) [\*]. \*The views expressed are those of the author(s) and not necessarily  
406 those of the NIHR or the Department of Health and Social Care. This work was supported by  
407 Health Data Research UK, which is funded by the UK Medical Research Council, Engineering  
408 and Physical Sciences Research Council, Economic and Social Research Council,  
409 Department of Health and Social Care (England), Chief Scientist Office of the Scottish  
410 Government Health and Social Care Directorates, Health and Social Care Research and  
411 Development Division (Welsh Government), Public Health Agency (Northern Ireland), British  
412 Heart Foundation and Wellcome.

413 \*The views expressed are those of the authors and not necessarily those of the NHS or the  
414 Department of Health and Social Care.

## 415 **Conflicts of interest disclosure**

416 VS has received honoraria from Sanofi for consulting. He also has ongoing research  
417 collaboration with Bayer Ltd. (All outside this study).

418

419 **Tables**

420 **Table 1. Characteristics of study participants.**

| Characteristic                     | Asthma                   |                      | COPD                     |                      |
|------------------------------------|--------------------------|----------------------|--------------------------|----------------------|
|                                    | Incident cases (n = 435) | Non-cases (n = 5244) | Incident cases (n = 145) | Non-cases (n = 5932) |
| Females, n (%)                     | 252 (57.9%)              | 2740 (52.3%)         | 43 (29.7%)               | 3204 (54%)           |
| Baseline age, years                | 50.9 (40.5-60.5)         | 50.5 (39.2-59.3)     | 59.5 (53.6-66.5)         | 50.5 (39.2-59.5)     |
| Age at first event, years          | 57.6 (46.7-67.3)         | --                   | 69.1 (61.3-73.6)         | --                   |
| Body mass index, kg/m <sup>2</sup> | 26.7 (24-30.7)           | 26.3 (23.7-29.3)     | 26.6 (23.5-29.6)         | 26.4 (23.7-29.5)     |
| Current smoker, n (%)              | 151 (34.8%)              | 1192 (22.8%)         | 105 (72.9%)              | 1313 (22.2%)         |
| Ex-smoker, n (%)                   | 94 (21.6%)               | 1181 (22.5%)         | 32 (22.1%)               | 1321 (22.3%)         |

421 Continuous variables are presented as median (IQR).

422  
423  
424  
425  
426

427 **Table 2. Association of risk factors separately and combined for incident asthma and COPD.**

| Covariate                | Asthma           |         |                  |         | COPD              |         |                    |         |
|--------------------------|------------------|---------|------------------|---------|-------------------|---------|--------------------|---------|
|                          | Univariable      |         | Multivariable    |         | Univariable       |         | Multivariable      |         |
|                          | HR (95% CI)      | P value | HR (95% CI)      | P value | HR (95% CI)       | P value | HR (95% CI)        | P value |
| Sex (Male)               | 0.71 (0.49-1.03) | 0.07    | 0.67 (0.46-0.97) | 0.03    | 2.19 (1.25-3.82)  | 0.01    | 1.35 (0.76-2.4)    | 0.31    |
| Baseline age (years)     | 0.99 (0.98-1.01) | 0.28    | 1.00 (0.98-1.01) | 0.75    | 1.07 (1.04-1.1)   | <0.001  | 1.1 (1.07-1.13)    | <0.001  |
| BMI (kg/m <sup>2</sup> ) | 1.02 (0.99-1.06) | 0.22    | 1.03 (0.99-1.07) | 0.13    | 1.02 (0.97-1.08)  | 0.48    | 0.99 (0.92-1.06)   | 0.8     |
| Smoking (Yes)            | 2.21 (1.53-3.2)  | <0.001  | 2.06 (1.4-3.03)  | <0.001  | 8.16 (4.55-14.64) | <0.001  | 11.07 (5.81-21.09) | <0.001  |
| Gut microbiome           | 1.44 (1.23-1.67) | <0.001  | 1.34 (1.15-1.57) | <0.001  | 1.39 (1.3-1.49)   | <0.001  | 1.18 (1.08-1.29)   | <0.001  |

429 HR, hazard ratio; CI, confidence interval; BMI, body mass index; Gut microbiome score is represented as  
430 microbiome-based predictions per SD. All analyses were performed in the validation set.

431  
432

433 **Figures**

434 **Fig 1. Gut microbiome composition and characteristics.** **A**, Gut microbiome profiles at phylum level.  
 435 **B**, Box plots of the 20 most abundant genera sorted by mean relative abundance. **C**, Shannon's,  
 436 Pielou's and Chao1 indices at genus level between cases and non-cases. Median values are  
 437 represented by horizontal lines. **D**, Principal component analysis on centered log-ratio transformed  
 438 abundances at genus level. **E**, Genera associated with incident asthma or COPD surpassing a false  
 439 discovery rate threshold of 5% ( $P_{FDR} < 0.05$ ). Only the top 10 most abundant genera for each of  
 440 combination of positive or negative associations, with COPD or asthma.

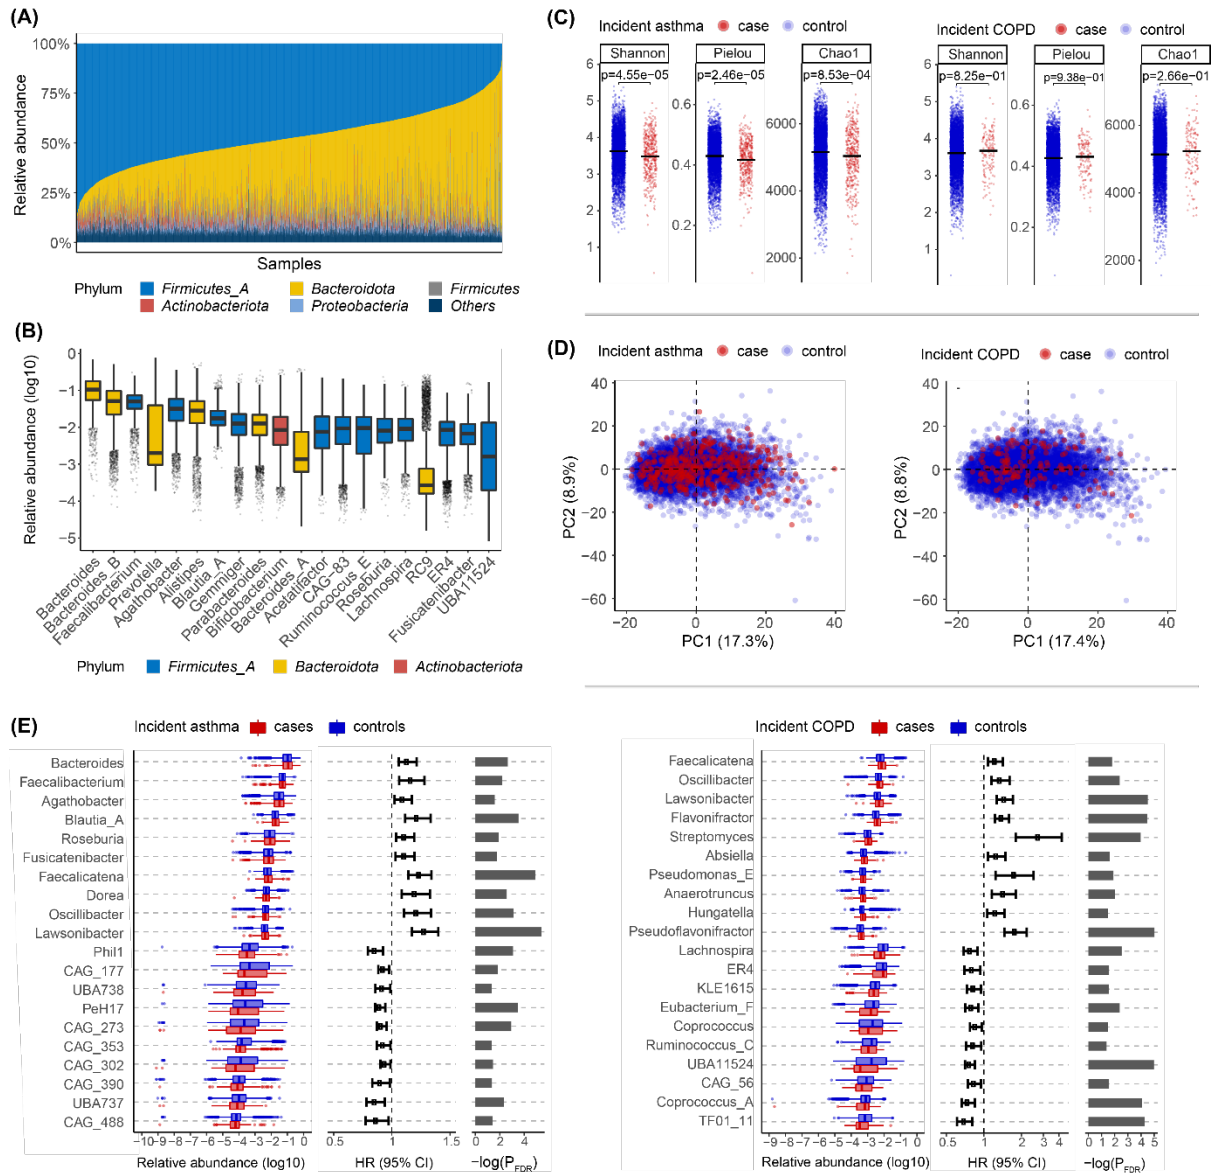

441

442

443



444 **Fig 2. Predictive capacity of each risk factor separately for A, incident asthma or B, COPD.**  
445 Univariate Cox models were performed for each of sex, baseline age, BMI, smoking and gut microbiome  
446 individually. Points and error bars represent the C-indices and 95% confidence intervals.

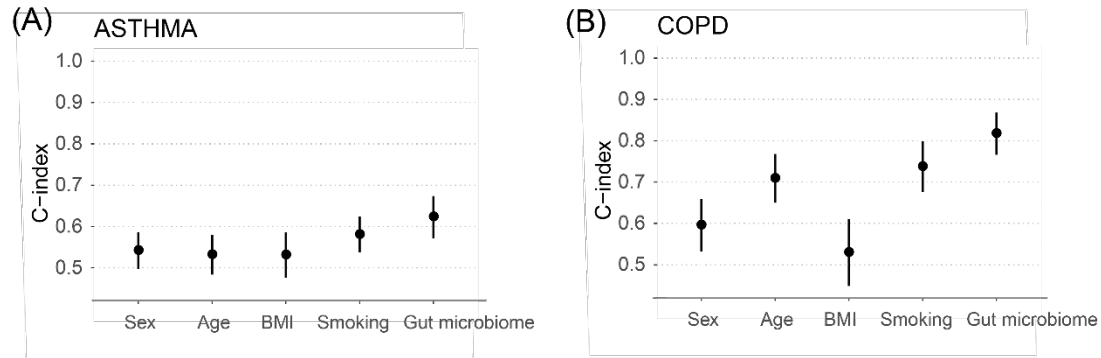

447

448

449 **Fig 3. Subgroup analyses for A, incident asthma or B, COPD.** Cox models were applied to test for  
 450 interactions between gut microbiome and patient characteristic subgroups. Points and error bars  
 451 represent hazard ratios per SD and 95% confidence intervals of gut microbiome score across  
 452 subgroups.

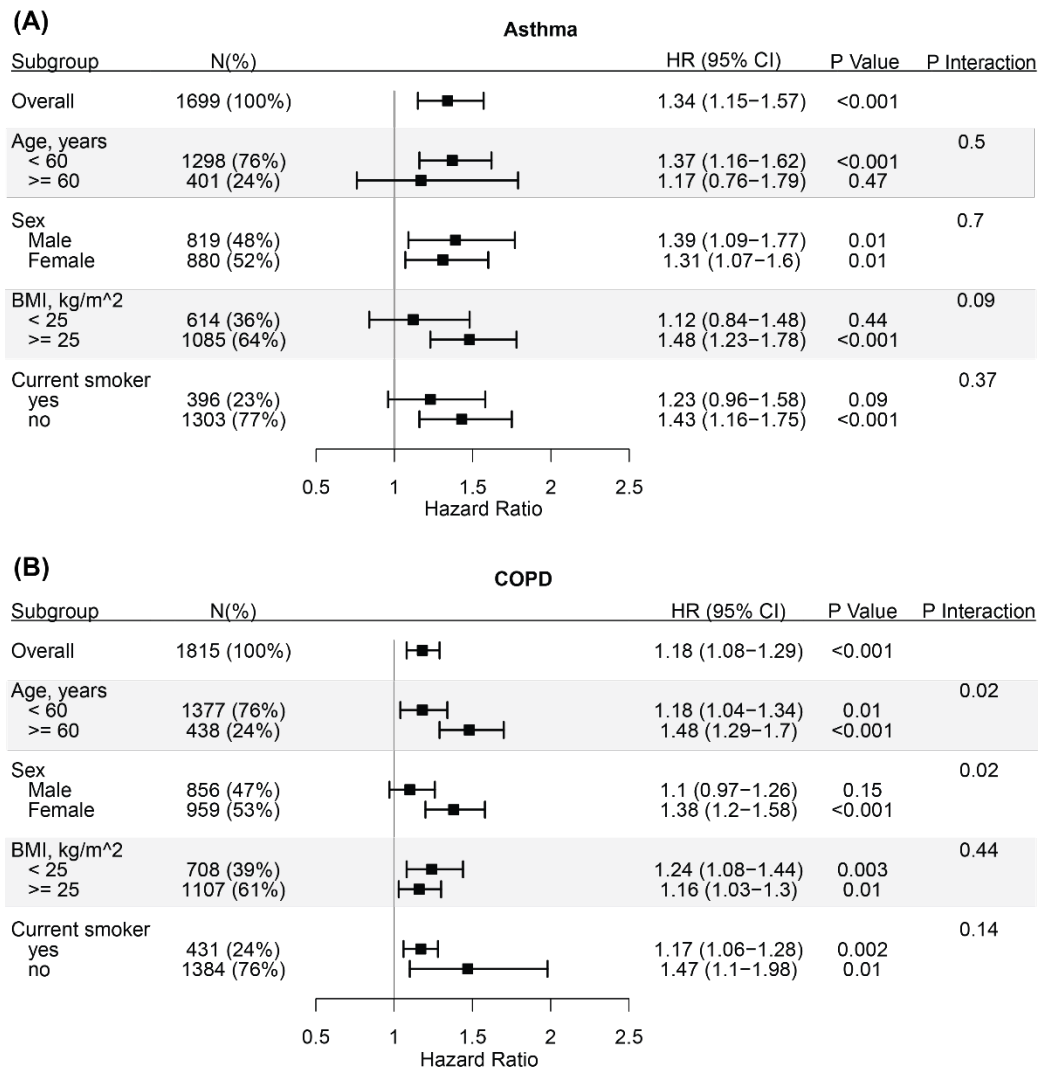

453

454

455 **Fig 4. Predictive capacity of integrated models for A, incident asthma and B, COPD.** 'Ref' is a  
456 reference model that jointly considers age, sex and BMI. Points and error bars represent the C-indices  
457 and 95% confidence intervals. Analysis of deviance based on the log partial likelihood, P<0.01, \*\*;  
458 P<0.001, \*\*\*.

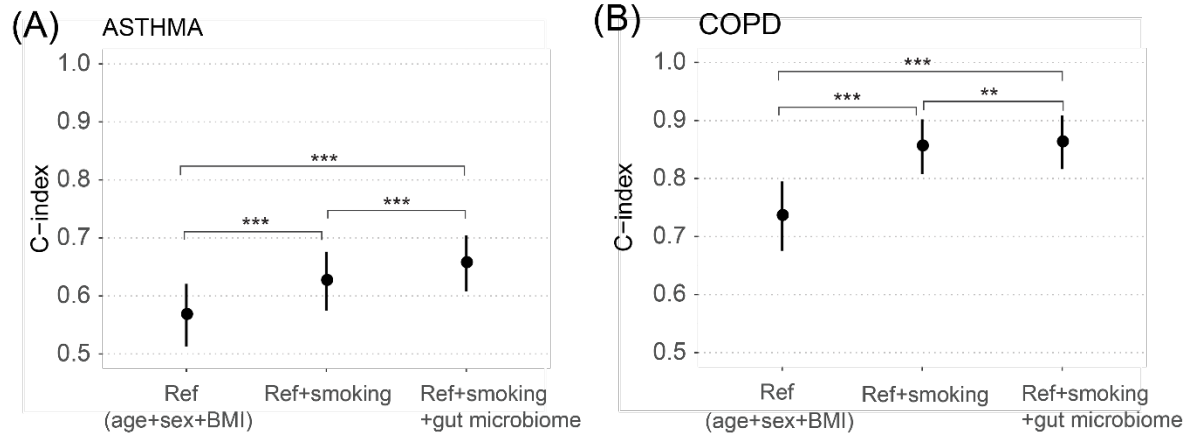

459

460

461

## 462 References

- 463 1. Halpin, D.M.G., et al., *Global Initiative for the Diagnosis, Management, and Prevention of*  
464 *Chronic Obstructive Lung Disease. The 2020 GOLD Science Committee Report on COVID-19*  
465 *and Chronic Obstructive Pulmonary Disease.* Am J Respir Crit Care Med, 2021. **203**(1): p. 24-  
466 36.
- 467 2. Asthma, G.I.f., *Global Strategy for Asthma Management and Prevention.* 2020.
- 468 3. Papi, A., et al., *Asthma.* Lancet, 2018. **391**(10122): p. 783-800.
- 469 4. Barnes, P.J., *Therapeutic approaches to asthma-chronic obstructive pulmonary disease*  
470 *overlap syndromes.* J Allergy Clin Immunol, 2015. **136**(3): p. 531-45.
- 471 5. Mirza, S. and R. Benzo, *Chronic Obstructive Pulmonary Disease Phenotypes: Implications for*  
472 *Care.* Mayo Clin Proc, 2017. **92**(7): p. 1104-1112.
- 473 6. Kuruvilla, M.E., F.E. Lee, and G.B. Lee, *Understanding Asthma Phenotypes, Endotypes, and*  
474 *Mechanisms of Disease.* Clin Rev Allergy Immunol, 2019. **56**(2): p. 219-233.
- 475 7. McCracken, J.L., et al., *Diagnosis and Management of Asthma in Adults: A Review.* JAMA,  
476 2017. **318**(3): p. 279-290.
- 477 8. Polverino, F. and B. Celli, *The Challenge of Controlling the COPD Epidemic: Unmet Needs.*  
478 Am J Med, 2018. **131**(9S): p. 1-6.
- 479 9. Riley, C.M. and F.C. Sciruba, *Diagnosis and Outpatient Management of Chronic Obstructive*  
480 *Pulmonary Disease: A Review.* JAMA, 2019. **321**(8): p. 786-797.
- 481 10. Budden, K.F., et al., *Functional effects of the microbiota in chronic respiratory disease.* Lancet  
482 Respir Med, 2019. **7**(10): p. 907-920.
- 483 11. Chotirmall, S.H., et al., *Microbiomes in respiratory health and disease: An Asia-Pacific*  
484 *perspective.* Respirology, 2017. **22**(2): p. 240-250.
- 485 12. Shreiner, A.B., J.Y. Kao, and V.B. Young, *The gut microbiome in health and in disease.* Curr  
486 Opin Gastroenterol, 2015. **31**(1): p. 69-75.
- 487 13. Huffnagle, G.B., R.P. Dickson, and N.W. Lukacs, *The respiratory tract microbiome and lung*  
488 *inflammation: a two-way street.* Mucosal Immunol, 2017. **10**(2): p. 299-306.
- 489 14. Yatera, K., S. Noguchi, and H. Mukae, *The microbiome in the lower respiratory tract.* Respir  
490 Investig, 2018. **56**(6): p. 432-439.
- 491 15. Wang, Z., et al., *Lung microbiome dynamics in COPD exacerbations.* Eur Respir J, 2016. **47**(4):  
492 p. 1082-92.
- 493 16. Huang, Y.J., et al., *The airway microbiome in patients with severe asthma: Associations with*  
494 *disease features and severity.* J Allergy Clin Immunol, 2015. **136**(4): p. 874-84.
- 495 17. Huang, Y.J., et al., *Airway microbiome dynamics in exacerbations of chronic obstructive*  
496 *pulmonary disease.* J Clin Microbiol, 2014. **52**(8): p. 2813-23.
- 497 18. Teo, S.M., et al., *The infant nasopharyngeal microbiome impacts severity of lower respiratory*  
498 *infection and risk of asthma development.* Cell Host Microbe, 2015. **17**(5): p. 704-15.
- 499 19. Teo, S.M., et al., *Airway Microbiota Dynamics Uncover a Critical Window for Interplay of*  
500 *Pathogenic Bacteria and Allergy in Childhood Respiratory Disease.* Cell Host Microbe, 2018.  
501 **24**(3): p. 341-352 e5.
- 502 20. Dang, A.T. and B.J. Marsland, *Microbes, metabolites, and the gut-lung axis.* Mucosal  
503 Immunol, 2019. **12**(4): p. 843-850.
- 504 21. Barcik, W., et al., *The Role of Lung and Gut Microbiota in the Pathology of Asthma.* Immunity,  
505 2020. **52**(2): p. 241-255.
- 506 22. Stockholm, J., et al., *Maturation of the gut microbiome and risk of asthma in childhood.* Nat  
507 Commun, 2018. **9**(1): p. 141.
- 508 23. Depner, M., et al., *Maturation of the gut microbiome during the first year of life contributes to*  
509 *the protective farm effect on childhood asthma.* Nat Med, 2020. **26**(11): p. 1766-1775.
- 510 24. Huang, Y.J. and H.A. Boushey, *The microbiome in asthma.* J Allergy Clin Immunol, 2015.  
511 **135**(1): p. 25-30.
- 512 25. Tamburini, S., et al., *The microbiome in early life: implications for health outcomes.* Nat Med,  
513 2016. **22**(7): p. 713-22.

- 514 26. Barcik, W., et al., *Histamine-secreting microbes are increased in the gut of adult asthma*  
515 *patients*. J Allergy Clin Immunol, 2016. **138**(5): p. 1491-1494 e7.
- 516 27. Wang, Q., et al., *A metagenome-wide association study of gut microbiota in asthma in UK*  
517 *adults*. BMC Microbiol, 2018. **18**(1): p. 114.
- 518 28. Begley, L., et al., *Gut microbiota relationships to lung function and adult asthma phenotype: a*  
519 *pilot study*. BMJ Open Respir Res, 2018. **5**(1): p. e000324.
- 520 29. Hevia, A., et al., *Allergic Patients with Long-Term Asthma Display Low Levels of*  
521 *Bifidobacterium adolescentis*. PLoS One, 2016. **11**(2): p. e0147809.
- 522 30. Bowerman, K.L., et al., *Disease-associated gut microbiome and metabolome changes in*  
523 *patients with chronic obstructive pulmonary disease*. Nat Commun, 2020. **11**(1): p. 5886.
- 524 31. Salosensaari, A., et al., *Taxonomic signatures of cause-specific mortality risk in human gut*  
525 *microbiome*. Nat Commun, 2021. **12**(1): p. 2671.
- 526 32. Borodulin, K., et al., *Cohort Profile: The National FINRISK Study*. Int J Epidemiol, 2018.  
527 **47**(3): p. 696-696i.
- 528 33. Parks, D.H., et al., *A standardized bacterial taxonomy based on genome phylogeny*  
529 *substantially revises the tree of life*. Nat Biotechnol, 2018. **36**(10): p. 996-1004.
- 530 34. Hufnagl, K., et al., *Dysbiosis of the gut and lung microbiome has a role in asthma*. Semin  
531 Immunopathol, 2020. **42**(1): p. 75-93.
- 532 35. O'Dwyer, D.N., R.P. Dickson, and B.B. Moore, *The Lung Microbiome, Immunity, and the*  
533 *Pathogenesis of Chronic Lung Disease*. J Immunol, 2016. **196**(12): p. 4839-47.
- 534 36. Millares, L., et al., *Bronchial microbiome of severe COPD patients colonised by Pseudomonas*  
535 *aeruginosa*. Eur J Clin Microbiol Infect Dis, 2014. **33**(7): p. 1101-11.
- 536 37. Garcia-Vidal, C., et al., *Pseudomonas aeruginosa in patients hospitalised for COPD*  
537 *exacerbation: a prospective study*. Eur Respir J, 2009. **34**(5): p. 1072-8.
- 538 38. Garcia-Clemente, M., et al., *Impact of Pseudomonas aeruginosa Infection on Patients with*  
539 *Chronic Inflammatory Airway Diseases*. J Clin Med, 2020. **9**(12).
- 540 39. Davies, G., et al., *The effect of Pseudomonas aeruginosa on pulmonary function in patients*  
541 *with bronchiectasis*. Eur Respir J, 2006. **28**(5): p. 974-9.
- 542 40. Budden, K.F., et al., *Emerging pathogenic links between microbiota and the gut-lung axis*. Nat  
543 Rev Microbiol, 2017. **15**(1): p. 55-63.
- 544 41. Zhang, D., et al., *The Cross-Talk Between Gut Microbiota and Lungs in Common Lung*  
545 *Diseases*. Front Microbiol, 2020. **11**: p. 301.
- 546 42. Arrieta, M.C., et al., *Early infancy microbial and metabolic alterations affect risk of childhood*  
547 *asthma*. Sci Transl Med, 2015. **7**(307): p. 307ra152.
- 548 43. Chiu, C.Y., et al., *Gut microbial-derived butyrate is inversely associated with IgE responses to*  
549 *allergens in childhood asthma*. Pediatr Allergy Immunol, 2019. **30**(7): p. 689-697.
- 550 44. Vael, C., et al., *Early intestinal Bacteroides fragilis colonisation and development of asthma*.  
551 BMC Pulm Med, 2008. **8**: p. 19.
- 552 45. Han, M.K., et al., *Gender and chronic obstructive pulmonary disease: why it matters*. Am J  
553 Respir Crit Care Med, 2007. **176**(12): p. 1179-84.
- 554 46. Zein, J.G. and S.C. Erzurum, *Asthma is Different in Women*. Curr Allergy Asthma Rep, 2015.  
555 **15**(6): p. 28.
- 556 47. Zammit, C., et al., *Obesity and respiratory diseases*. Int J Gen Med, 2010. **3**: p. 335-43.
- 557 48. Sears, M.R., *Smoking, asthma, chronic airflow obstruction and COPD*. Eur Respir J, 2015.  
558 **45**(3): p. 586-8.
- 559 49. O'Toole, P.W. and I.B. Jeffery, *Gut microbiota and aging*. Science, 2015. **350**(6265): p. 1214-  
560 5.
- 561 50. Haro, C., et al., *Intestinal Microbiota Is Influenced by Gender and Body Mass Index*. PLoS  
562 One, 2016. **11**(5): p. e0154090.
- 563 51. Fransen, F., et al., *The Impact of Gut Microbiota on Gender-Specific Differences in Immunity*.  
564 Front Immunol, 2017. **8**: p. 754.
- 565 52. Biedermann, L., et al., *Smoking cessation induces profound changes in the composition of the*  
566 *intestinal microbiota in humans*. PLoS One, 2013. **8**(3): p. e59260.



- 567 53. Pajunen, P., et al., *The validity of the Finnish Hospital Discharge Register and Causes of Death*  
568 *Register data on coronary heart disease*. Eur J Cardiovasc Prev Rehabil, 2005. **12**(2): p. 132-  
569 7.
- 570 54. Tolonen, H., et al., *The validation of the Finnish Hospital Discharge Register and Causes of*  
571 *Death Register data on stroke diagnoses*. Eur J Cardiovasc Prev Rehabil, 2007. **14**(3): p. 380-  
572 5.
- 573 55. Sund, R., *Quality of the Finnish Hospital Discharge Register: a systematic review*. Scand J  
574 Public Health, 2012. **40**(6): p. 505-15.
- 575 56. Hillmann, B., et al., *Evaluating the Information Content of Shallow Shotgun Metagenomics*.  
576 mSystems, 2018. **3**(6).
- 577 57. Köster, J. and S. Rahmann, *Snakemake--a scalable bioinformatics workflow engine*.  
578 Bioinformatics, 2012. **28**(19): p. 2520-2.
- 579 58. Kim, D., et al., *Centrifuge: rapid and sensitive classification of metagenomic sequences*.  
580 Genome Res, 2016. **26**(12): p. 1721-1729.

581
